# Supplementary material for: Fe3+-induced luminescence quenching in carbon dots – mechanism unveiled
Source: Royal Society of Chemistry journal article supplement (doi:10.1039/d3ay02202a), 2024-01-01
Supplement: d3ay02202a1.pdf [file d3ay02202a1.pdf]

## Supplementary information

### Fe<sup>3+</sup> Induced Luminescence Quenching in Carbon Dots - Mechanism unveiled

Varsha Raveendran. P.T., Anjali C. and Renuka Neeroli Kizhakayil\*

Advanced Materials Research Centre, Department of Chemistry,

University of Calicut, Kerala-673 635, India

\*E-mail addresses: renuka@uoc.ac.in

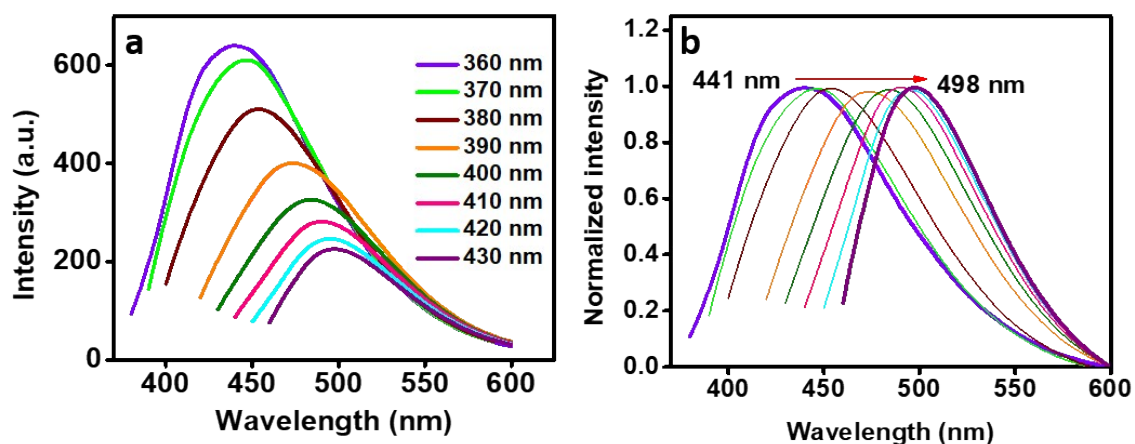

Figure S1 a) Excitation wavelength dependent emission spectra of LL-CDs , b) Normalized spectra
